# Supplementary material for: Molecular characteristics and diurnal variations of organic aerosols at a rural site in the North China Plain with implications for the influence of regional biomass burning
Source: Copernicus journal article supplement (doi:10.5194/acp-2019-75), 2019-04-25
Supplement: Supplementary file 1 [file acp-2019-75-supplement.pdf]

Supporting information

**Molecular characteristics and diurnal variations of organic aerosols  
at a rural site in the North China Plain with implications for the  
influence of regional biomass burning**

Jianjun Li<sup>1,4</sup>, Gehui Wang<sup>2,3\*</sup>, Qi Zhang<sup>4\*</sup>, Jin Li<sup>1</sup>, Can Wu<sup>2</sup>, Wenqing Jiang<sup>4</sup>, Tong  
Zhu<sup>5</sup>, and Limin Zeng<sup>5</sup>

<sup>1</sup>Key Lab of Aerosol Chemistry & Physics, SKLLQG, Institute of Earth Environment,  
Chinese Academy of Sciences, Xi'an, 710061, China

<sup>2</sup>Key Laboratory of Geographic Information Science of the Ministry of Education,  
School of Geographic Sciences, East China Normal University, Shanghai 200241,  
China

<sup>3</sup>Institute of Eco-Chongming, 3663 N. Zhongshan Rd., Shanghai 200062, China

<sup>4</sup>Department of Environmental Toxicology, University of California, Davis, CA  
95616, USA

<sup>5</sup>BIC-ESAT and SKL-ESPC, College of Environmental Sciences and Engineering,  
Peking University, Beijing, China

\*Corresponding authors:

Prof. Gehui Wang, E-mail: [ghwang@geo.ecnu.edu.cn](mailto:ghwang@geo.ecnu.edu.cn);

Prof. Qi Zhang, E-mail: [dkwzhang@ucdavis.edu](mailto:dkwzhang@ucdavis.edu)

Table S1 Concentrations of total measured organic compounds (ng m<sup>-3</sup>) in the time-resolved (3-h) PM<sub>2.5</sub> samples in the rural site of NCP during the whole sampling period, Period 1 (P1) and Period 2 (P2).

| Compounds         | Whole period (N=117) |       |       |       | Period 1 (N=28) |       |       |       | Period 2 (N=13) |       |      |      |
|-------------------|----------------------|-------|-------|-------|-----------------|-------|-------|-------|-----------------|-------|------|------|
|                   | min                  | max   | Mean  | SD    | min             | max   | Mean  | SD    | min             | max   | Mean | SD   |
| I. n-alkanes      |                      |       |       |       |                 |       |       |       |                 |       |      |      |
| C <sub>18</sub>   | 0.76                 | 7.82  | 3.05  | 1.35  | 1.70            | 6.42  | 3.55  | 1.22  | 1.16            | 4.58  | 2.26 | 0.96 |
| C <sub>19</sub>   | 0.73                 | 6.83  | 2.66  | 1.28  | 0.81            | 5.83  | 3.03  | 1.19  | 1.02            | 3.72  | 2.04 | 0.86 |
| C <sub>20</sub>   | 0.69                 | 5.44  | 2.08  | 0.96  | 0.80            | 5.44  | 2.69  | 1.02  | 0.69            | 2.69  | 1.46 | 0.57 |
| C <sub>21</sub>   | 1.12                 | 9.47  | 4.35  | 1.93  | 2.50            | 9.47  | 5.93  | 1.83  | 1.46            | 4.06  | 2.49 | 0.75 |
| C <sub>22</sub>   | 0.72                 | 8.85  | 3.25  | 1.68  | 1.53            | 8.85  | 4.62  | 1.89  | 0.75            | 2.72  | 1.58 | 0.55 |
| C <sub>23</sub>   | 0.78                 | 18.9  | 6.56  | 3.74  | 3.37            | 18.93 | 9.77  | 3.95  | 1.31            | 4.58  | 2.80 | 1.10 |
| C <sub>24</sub>   | 0.62                 | 17.1  | 4.75  | 3.07  | 2.46            | 12.6  | 6.47  | 2.31  | 1.03            | 2.60  | 1.87 | 0.54 |
| C <sub>25</sub>   | 0.77                 | 25.2  | 8.10  | 5.41  | 3.62            | 20.4  | 12.0  | 4.27  | 1.48            | 3.84  | 2.50 | 0.80 |
| C <sub>26</sub>   | 0.84                 | 22.4  | 6.35  | 4.63  | 3.21            | 15.7  | 9.11  | 3.66  | 1.21            | 3.52  | 2.17 | 0.82 |
| C <sub>27</sub>   | 0.92                 | 52.2  | 16.2  | 11.7  | 7.79            | 44.7  | 28.3  | 9.70  | 1.65            | 6.03  | 3.50 | 1.27 |
| C <sub>28</sub>   | 0.55                 | 26.9  | 7.85  | 5.55  | 3.88            | 18.8  | 11.9  | 4.13  | 0.55            | 5.25  | 2.35 | 1.25 |
| C <sub>29</sub>   | 0.76                 | 249.3 | 44.6  | 39.3  | 16.9            | 135.1 | 80.2  | 31.5  | 2.66            | 25.9  | 7.39 | 5.94 |
| C <sub>30</sub>   | 0.24                 | 49.1  | 8.67  | 6.91  | 4.95            | 26.1  | 13.6  | 4.70  | 0.57            | 6.16  | 2.61 | 1.34 |
| C <sub>31</sub>   | 0.18                 | 317.5 | 42.7  | 46.7  | 11.8            | 317.5 | 79.1  | 61.3  | 2.47            | 27.7  | 8.11 | 7.20 |
| C <sub>32</sub>   | 0.40                 | 61.5  | 9.65  | 8.07  | 6.12            | 31.3  | 14.9  | 5.08  | 0.40            | 6.69  | 2.65 | 1.72 |
| C <sub>33</sub>   | 0.95                 | 63.4  | 15.4  | 11.6  | 7.32            | 42.5  | 24.5  | 8.54  | 0.95            | 7.30  | 3.53 | 2.08 |
| C <sub>34</sub>   | 0.28                 | 51.1  | 7.77  | 6.70  | 5.53            | 24.4  | 12.2  | 4.36  | 0.28            | 4.62  | 1.93 | 1.20 |
| C <sub>35</sub>   | 0.24                 | 44.5  | 7.19  | 6.09  | 5.04            | 23.1  | 11.9  | 4.38  | 0.24            | 3.60  | 1.53 | 1.05 |
| C <sub>36</sub>   | 0.49                 | 37.9  | 6.4   | 5.19  | 3.92            | 18.3  | 9.94  | 3.80  | 0.49            | 2.65  | 1.49 | 0.77 |
| subtotal          | 9.97                 | 722.2 | 206.9 | 149.3 | 94.7            | 722.3 | 343.7 | 134.1 | 25.1            | 103.2 | 54.3 | 22.4 |
| II. Fatty acids   |                      |       |       |       |                 |       |       |       |                 |       |      |      |
| C <sub>12:0</sub> | 1.67                 | 35.7  | 10.6  | 5.69  | 5.75            | 25.7  | 13.8  | 4.53  | 3.40            | 11.57 | 6.43 | 2.23 |
| C <sub>13:0</sub> | 0.84                 | 18.8  | 6.52  | 3.64  | 3.23            | 16.2  | 9.16  | 3.75  | 1.66            | 5.42  | 3.19 | 1.02 |
| C <sub>14:0</sub> | 3.13                 | 153.9 | 35.9  | 22.2  | 17.2            | 85.3  | 51.2  | 18.0  | 6.92            | 37.3  | 14.3 | 8.33 |
| C <sub>15:0</sub> | 1.30                 | 22.8  | 9.12  | 4.6   | 5.82            | 22.8  | 13.3  | 4.30  | 2.12            | 7.70  | 4.60 | 1.62 |
| C <sub>16:0</sub> | 11.9                 | 286.0 | 76.4  | 48.5  | 38.0            | 286.0 | 111.8 | 47.7  | 11.9            | 56.8  | 28.6 | 10.3 |
| C <sub>17:0</sub> | 0.96                 | 18.6  | 5.38  | 3.52  | 2.14            | 18.6  | 8.19  | 3.79  | 1.08            | 9.81  | 2.87 | 2.15 |
| C <sub>18:0</sub> | 7.20                 | 136.2 | 34.2  | 23.7  | 24.0            | 136.2 | 53.3  | 23.2  | 7.20            | 24.4  | 12.6 | 4.75 |
| C <sub>19:0</sub> | 0.51                 | 9.65  | 3.01  | 2.14  | 1.20            | 9.65  | 5.02  | 2.39  | 0.54            | 2.01  | 1.10 | 0.35 |
| C <sub>20:0</sub> | 1.31                 | 27.3  | 8.61  | 6.20  | 3.90            | 27.3  | 14.2  | 6.48  | 1.31            | 4.81  | 2.71 | 0.91 |
| C <sub>21:0</sub> | 0.77                 | 21.9  | 5.20  | 4.51  | 1.79            | 21.9  | 9.55  | 5.45  | 0.77            | 3.09  | 1.49 | 0.57 |
| C <sub>22:0</sub> | 2.76                 | 103.4 | 25.7  | 21.6  | 6.78            | 93.3  | 43.2  | 23.6  | 3.32            | 42.2  | 9.72 | 10.2 |
| C <sub>23:0</sub> | 1.36                 | 74.2  | 16.5  | 15.7  | 6.55            | 74.2  | 32.0  | 19.3  | 1.44            | 9.71  | 3.91 | 2.08 |
| C <sub>24:0</sub> | 2.78                 | 122.0 | 29.4  | 25.9  | 9.80            | 122.0 | 55.6  | 31.6  | 3.22            | 14.2  | 7.21 | 2.81 |
| C <sub>25:0</sub> | 0.96                 | 42.6  | 10.6  | 9.72  | 3.45            | 42.6  | 21.9  | 11.3  | 1.33            | 4.35  | 2.87 | 0.93 |
| C <sub>26:0</sub> | 2.22                 | 118.2 | 30.4  | 27.5  | 10.3            | 118.2 | 60.2  | 30.6  | 2.70            | 11.0  | 5.82 | 1.98 |
| C <sub>27:0</sub> | 0.71                 | 52.3  | 12.1  | 12.4  | 3.39            | 52.3  | 27.2  | 14.8  | 1.07            | 3.24  | 1.95 | 0.64 |
| C <sub>28:0</sub> | 2.49                 | 319.7 | 77.9  | 79.0  | 15.5            | 319.7 | 162.3 | 84.3  | 5.00            | 28.7  | 10.6 | 6.71 |
| C <sub>29:0</sub> | 1.19                 | 46.7  | 13.8  | 12.2  | 3.57            | 46.7  | 26.9  | 12.7  | 1.44            | 5.73  | 3.20 | 1.12 |
| C <sub>30:0</sub> | 1.84                 | 523.4 | 87.8  | 88.1  | 22.5            | 291.9 | 159.1 | 69.9  | 5.44            | 48.1  | 13.9 | 11.9 |
| C <sub>16:1</sub> | 0.83                 | 13.1  | 4.13  | 2.52  | 2.41            | 11.0  | 6.05  | 1.93  | 0.83            | 11.6  | 2.52 | 2.70 |
| C <sub>18:1</sub> | 0.63                 | 25.0  | 4.69  | 3.81  | 2.94            | 14.9  | 6.74  | 2.72  | 0.95            | 7.28  | 2.30 | 1.66 |

|                         |                 |       |       |       |       |       |       |       |      |       |       |      |
|-------------------------|-----------------|-------|-------|-------|-------|-------|-------|-------|------|-------|-------|------|
| C <sub>18:2</sub>       | 1.37            | 30.1  | 6.65  | 5.10  | 5.29  | 20.4  | 9.73  | 3.83  | 1.37 | 14.50 | 3.50  | 3.28 |
| subtotal                | 64.6            | 1777  | 514.4 | 384.3 | 206.7 | 1528  | 900.3 | 358.3 | 81.4 | 234.4 | 145.3 | 47.7 |
| III. Fatty alcohols     |                 |       |       |       |       |       |       |       |      |       |       |      |
| C <sub>22</sub>         | 0.36            | 18.9  | 4.55  | 3.53  | 2.33  | 14.0  | 6.74  | 3.32  | 0.36 | 3.01  | 1.38  | 0.63 |
| C <sub>23</sub>         | 0.15            | 11.2  | 2.70  | 2.29  | 1.15  | 8.53  | 4.12  | 2.06  | 0.37 | 1.44  | 0.87  | 0.32 |
| C <sub>24</sub>         | 0.33            | 45.2  | 7.33  | 7.18  | 1.76  | 41.3  | 12.5  | 7.00  | 0.86 | 4.27  | 1.60  | 0.93 |
| C <sub>25</sub>         | 0.13            | 12.6  | 2.99  | 2.73  | 0.88  | 11.90 | 4.85  | 2.30  | 0.24 | 1.70  | 0.77  | 0.34 |
| C <sub>26</sub>         | 0.34            | 73.1  | 17.4  | 15.3  | 6.35  | 63.2  | 29.4  | 15.0  | 1.82 | 9.60  | 3.73  | 1.99 |
| C <sub>27</sub>         | 0.25            | 17.00 | 4.71  | 3.96  | 1.52  | 17.00 | 8.84  | 3.96  | 0.62 | 1.72  | 1.06  | 0.31 |
| C <sub>28</sub>         | 0.78            | 667.7 | 110.5 | 122.0 | 23.0  | 421.0 | 178.9 | 98.7  | 8.30 | 66.4  | 17.8  | 15.9 |
| C <sub>29</sub>         | 0.19            | 26.2  | 5.45  | 5.15  | 1.70  | 21.3  | 9.85  | 5.12  | 0.49 | 2.44  | 1.10  | 0.48 |
| C <sub>30</sub>         | 0.63            | 139.4 | 36.9  | 33.3  | 20.0  | 135.4 | 66.8  | 30.4  | 2.45 | 12.0  | 5.55  | 3.23 |
| subtotal                | 3.18            | 975.9 | 192.6 | 187.4 | 62.4  | 638.2 | 322.0 | 150.7 | 16.6 | 100.2 | 33.9  | 22.6 |
| IV. Sugar compounds     |                 |       |       |       |       |       |       |       |      |       |       |      |
| <i>Anhydrosugars</i>    |                 |       |       |       |       |       |       |       |      |       |       |      |
| galactosan              | 1.03            | 97.78 | 18.5  | 20.6  | 2.16  | 97.8  | 29.5  | 27.9  | 1.45 | 13.3  | 4.61  | 3.13 |
| mannosan                | 0.69            | 54.82 | 9.78  | 10.4  | 1.61  | 54.8  | 15.0  | 13.3  | 0.96 | 6.63  | 2.83  | 1.43 |
| levoglucosan            | 5.56            | 1447  | 240.1 | 287.8 | 29.3  | 1428  | 404.0 | 344.0 | 11.2 | 123.0 | 47.8  | 26.2 |
| <i>Sugars</i>           |                 |       |       |       |       |       |       |       |      |       |       |      |
| fructose                | 0.48            | 98.6  | 8.96  | 10.4  | 4.15  | 23.6  | 13.9  | 5.12  | 0.90 | 4.28  | 1.90  | 0.94 |
| glucose                 | 1.29            | 315.9 | 48.9  | 50.2  | 17.4  | 245.9 | 90.7  | 49.0  | 3.49 | 37.4  | 11.0  | 9.51 |
| sucrose                 | 0.13            | 20.3  | 3.57  | 3.33  | 1.53  | 9.38  | 4.99  | 1.96  | 0.20 | 1.57  | 0.70  | 0.36 |
| trehalose               | 0.06            | 25.3  | 4.23  | 4.91  | 1.59  | 25.3  | 9.46  | 5.91  | 0.18 | 3.75  | 0.88  | 0.98 |
| <i>Sugar alcohols</i>   |                 |       |       |       |       |       |       |       |      |       |       |      |
| arabitol                | 0.72            | 852.2 | 40.6  | 83.8  | 6.67  | 115.0 | 55.4  | 29.2  | 1.34 | 26.3  | 6.65  | 6.68 |
| mannitol                | 0.43            | 669.6 | 56.6  | 81.6  | 12.9  | 211.9 | 92.7  | 53.4  | 1.09 | 107.3 | 16.4  | 29.1 |
| inositol                | 0.08            | 7.08  | 1.67  | 1.40  | 0.74  | 5.93  | 2.94  | 1.48  | 0.19 | 1.24  | 0.48  | 0.25 |
| subtotal                | 15.9            | 2228  | 432.8 | 428.9 | 151.9 | 1727  | 718.0 | 403.1 | 39.7 | 241.3 | 93.2  | 52.9 |
| V. PAHs                 |                 |       |       |       |       |       |       |       |      |       |       |      |
| phenanthrene            | 0.21            | 6.21  | 1.62  | 1.36  | 0.78  | 6.21  | 2.69  | 1.58  | 0.22 | 0.73  | 0.41  | 0.16 |
| anthracene              | 0.04            | 0.38  | 0.14  | 0.08  | 0.09  | 0.36  | 0.20  | 0.07  | 0.05 | 0.09  | 0.07  | 0.01 |
| fluoranthene            | 0.07            | 4.80  | 0.92  | 0.83  | 0.42  | 2.68  | 1.50  | 0.71  | 0.07 | 0.28  | 0.15  | 0.05 |
| pyrene                  | 0.09            | 3.87  | 0.90  | 0.79  | 0.43  | 2.89  | 1.52  | 0.80  | 0.09 | 0.36  | 0.18  | 0.06 |
| benz(a)anthracene       | 0.03            | 2.30  | 0.49  | 0.48  | 0.15  | 1.80  | 0.82  | 0.54  | 0.05 | 0.21  | 0.09  | 0.04 |
| chrysene / triphenylene | 0.09            | 5.92  | 1.16  | 1.15  | 0.40  | 4.02  | 1.83  | 1.08  | 0.09 | 0.35  | 0.18  | 0.08 |
| benzo(b)fluoranthene    | 0.07            | 9.14  | 1.82  | 1.91  | 0.45  | 6.23  | 2.75  | 1.81  | 0.13 | 0.77  | 0.31  | 0.19 |
| benzo(k)fluoranthene    | 0.03            | 2.58  | 0.56  | 0.55  | 0.15  | 1.97  | 0.84  | 0.56  | 0.04 | 0.26  | 0.10  | 0.06 |
| benzo(e)pyrene          | 0.07            | 6.26  | 1.23  | 1.28  | 0.36  | 4.28  | 1.82  | 1.15  | 0.09 | 0.51  | 0.22  | 0.12 |
| benzo(a)pyrene          | 0.02            | 3.66  | 0.69  | 0.70  | 0.16  | 2.43  | 1.08  | 0.77  | 0.05 | 0.23  | 0.10  | 0.05 |
| perylene                | 0.00            | 0.89  | 0.18  | 0.18  | 0.06  | 0.63  | 0.29  | 0.19  | 0.02 | 0.07  | 0.03  | 0.01 |
| indeno[123-cd]pyrene    | 0.03            | 5.60  | 1.04  | 1.17  | 0.15  | 3.57  | 1.46  | 1.10  | 0.05 | 0.59  | 0.21  | 0.15 |
| dibenz(a,h)anthracene   | 0.01            | 1.22  | 0.20  | 0.20  | 0.07  | 0.55  | 0.28  | 0.16  | 0.02 | 0.16  | 0.05  | 0.04 |
| benzo(ghi)perylene      | 0.03            | 4.89  | 1.01  | 1.05  | 0.25  | 4.01  | 1.50  | 1.10  | 0.07 | 0.64  | 0.22  | 0.17 |
| subtotal                | 1.11            | 48.5  | 12.0  | 11.0  | 4.21  | 37.7  | 18.6  | 11.0  | 1.25 | 5.01  | 2.33  | 0.98 |
| VI. Hopanes             |                 |       |       |       |       |       |       |       |      |       |       |      |
| C <sub>29</sub> αβ      | 0.30            | 2.77  | 1.05  | 0.61  | 0.42  | 2.77  | 1.47  | 0.59  | 0.30 | 0.68  | 0.52  | 0.10 |
| C <sub>29</sub> βα      | ND <sup>a</sup> | 1.20  | 0.37  | 0.26  | ND    | 1.20  | 0.68  | 0.20  | ND   | 0.23  | 0.15  | 0.04 |
| C <sub>30</sub> αβ      | 0.29            | 3.15  | 1.17  | 0.64  | 0.44  | 2.54  | 1.55  | 0.57  | 0.41 | 0.79  | 0.63  | 0.12 |
| C <sub>30</sub> βα      | ND              | 1.91  | 0.46  | 0.33  | ND    | 1.91  | 0.82  | 0.37  | ND   | 0.22  | 0.17  | 0.04 |

|                                    |      |        |       |       |       |       |       |       |      |       |       |      |
|------------------------------------|------|--------|-------|-------|-------|-------|-------|-------|------|-------|-------|------|
| C <sub>31</sub> αβS                | ND   | 2.14   | 0.59  | 0.49  | ND    | 2.14  | 0.91  | 0.58  | ND   | 0.28  | 0.19  | 0.05 |
| C <sub>31</sub> αβR                | ND   | 0.90   | 0.40  | 0.24  | ND    | 0.84  | 0.56  | 0.15  | ND   | 0.26  | 0.17  | 0.05 |
| subtotal                           | 0.66 | 10.81  | 3.46  | 2.38  | 0.86  | 9.97  | 4.40  | 2.48  | 1.14 | 2.28  | 1.81  | 0.31 |
| VII. Phthalate esters              |      |        |       |       |       |       |       |       |      |       |       |      |
| dimethyl                           | 0.10 | 14.6   | 4.17  | 2.82  | 1.38  | 14.6  | 5.34  | 3.31  | 0.20 | 4.74  | 2.46  | 1.36 |
| diethyl                            | 0.36 | 9.72   | 3.03  | 1.94  | 1.19  | 9.72  | 3.89  | 2.38  | 0.80 | 2.40  | 1.42  | 0.44 |
| diisobutyl                         | 4.86 | 49.3   | 22.7  | 9.45  | 17.3  | 45.7  | 27.3  | 6.42  | 9.40 | 20.3  | 14.6  | 3.67 |
| isobutylbutyl                      | 0.32 | 3.97   | 1.71  | 0.79  | 0.85  | 3.71  | 2.03  | 0.64  | 0.74 | 2.06  | 1.15  | 0.38 |
| dibutyl                            | 4.02 | 46.0   | 18.4  | 8.78  | 10.8  | 37.9  | 21.3  | 6.19  | 6.92 | 18.9  | 11.2  | 3.51 |
| bis (2-ethylhexyl)                 | 6.46 | 137.4  | 34.9  | 24.7  | 26.5  | 137.4 | 51.7  | 25.8  | 6.46 | 74.8  | 20.3  | 18.2 |
| Subtotal                           | 17.7 | 219.9  | 84.9  | 41.3  | 68.8  | 183.1 | 111.5 | 32.7  | 31.5 | 100.8 | 51.1  | 18.1 |
| VIII. Phthalic acids               |      |        |       |       |       |       |       |       |      |       |       |      |
| <i>o</i> -ph                       | 12.3 | 400.2  | 100.6 | 56.8  | 52.5  | 208.6 | 115.6 | 40.9  | 12.6 | 71.1  | 35.8  | 15.7 |
| <i>m</i> -ph                       | 0.60 | 19.6   | 3.77  | 3.74  | 1.27  | 19.02 | 5.75  | 4.32  | 0.60 | 8.97  | 1.77  | 2.12 |
| <i>p</i> -ph                       | 2.77 | 248.00 | 50.1  | 52.0  | 16.7  | 248.0 | 89.6  | 67.5  | 2.77 | 23.6  | 8.73  | 5.50 |
| Subtotal                           | 17.1 | 487.2  | 154.5 | 93.9  | 91.3  | 388.6 | 211.0 | 87.1  | 17.1 | 81.0  | 46.3  | 17.1 |
| IX. Biogenic SOA tracers           |      |        |       |       |       |       |       |       |      |       |       |      |
| <i>Isoprene SOA tracers</i>        |      |        |       |       |       |       |       |       |      |       |       |      |
| MeTHFdiols                         | 0.73 | 31.8   | 7.04  | 5.93  | 2.61  | 31.8  | 12.6  | 8.38  | 2.26 | 5.54  | 3.64  | 1.04 |
| C5-triols                          | 4.29 | 218.8  | 40.7  | 41.3  | 16.7  | 218.8 | 85.4  | 58.4  | 9.39 | 25.5  | 15.7  | 4.42 |
| MTs                                | 3.98 | 134.7  | 45.0  | 32.7  | 17.9  | 134.7 | 74.6  | 35.4  | 12.5 | 74.5  | 28.7  | 19.3 |
| 2-MGA                              | 2.00 | 60.0   | 19.2  | 13.4  | 9.89  | 60.0  | 35.9  | 13.2  | 4.08 | 24.2  | 8.93  | 5.51 |
| Σisoprene SOA tracers              | 11.1 | 404.1  | 111.9 | 85.8  | 48.3  | 404.1 | 208.5 | 104.9 | 34.8 | 127.5 | 57.0  | 29.4 |
| <i>α-/β-Pinene SOA tracers</i>     |      |        |       |       |       |       |       |       |      |       |       |      |
| <i>cis</i> -pinonic acid           | 1.13 | 29.9   | 10.6  | 6.6   | 4.06  | 29.9  | 14.4  | 6.25  | 2.34 | 10.8  | 4.86  | 2.36 |
| pinic acid                         | 1.94 | 37.4   | 10.5  | 6.74  | 4.92  | 35.8  | 15.3  | 8.07  | 2.61 | 37.4  | 7.09  | 8.83 |
| 3-hydroxyglutaric acid             | 1.21 | 51.1   | 14.0  | 11.4  | 8.6   | 51.1  | 26.4  | 13.4  | 1.51 | 6.87  | 3.20  | 1.41 |
| MBTCA                              | 6.86 | 81.1   | 31.3  | 13.8  | 15.7  | 50.1  | 29.3  | 9.58  | 18.4 | 49.8  | 29.8  | 9.28 |
| Σmonoterpene SOA tracers           | 11.1 | 166.2  | 66.1  | 31.2  | 37.3  | 166.2 | 85.3  | 34.9  | 26.7 | 64.5  | 44.6  | 12.6 |
| <i>β-Caryophyllene SOA tracers</i> |      |        |       |       |       |       |       |       |      |       |       |      |
| <i>β</i> -caryophyllinic acid      | 0.49 | 77.7   | 17.4  | 17.1  | 4.60  | 77.8  | 34.7  | 20.8  | 2.44 | 6.28  | 4.08  | 1.21 |
| subtotal                           | 22.7 | 618.1  | 195.2 | 125.9 | 107.6 | 618.1 | 328.4 | 152.0 | 65.6 | 193.4 | 105.6 | 38.3 |
| IX. Toluene SOA tracers            |      |        |       |       |       |       |       |       |      |       |       |      |
| DHOPA                              | 1.59 | 35.3   | 9.36  | 7.15  | 4.06  | 35.3  | 15.6  | 9.80  | 2.70 | 6.99  | 4.16  | 1.42 |

<sup>a</sup> ND: not detected.

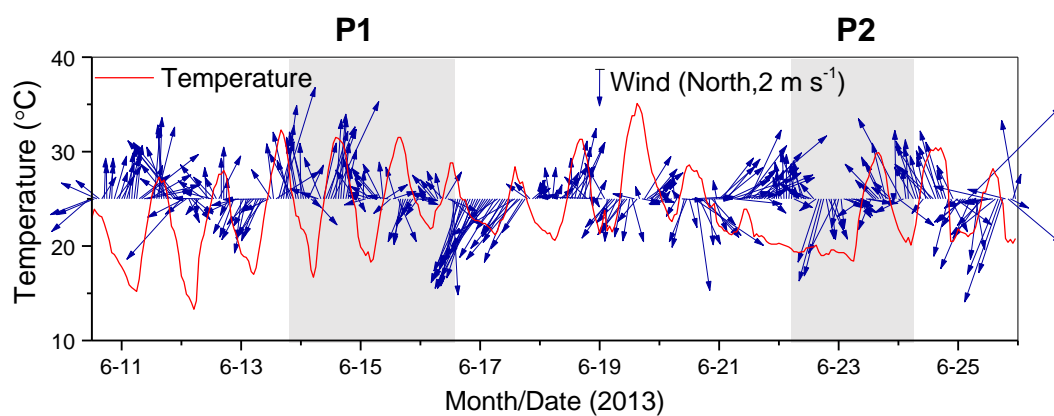

Figure S1 Temporal variations of temperature, wind speed, and wind direction at Gucheng during the study period.

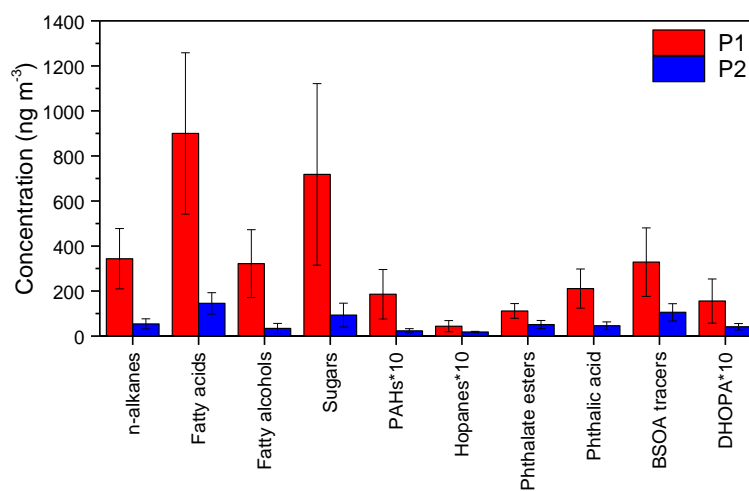

Figure S2. A comparison of the average concentrations of different organic compound classes in PM<sub>2.5</sub> during P1 and P2.

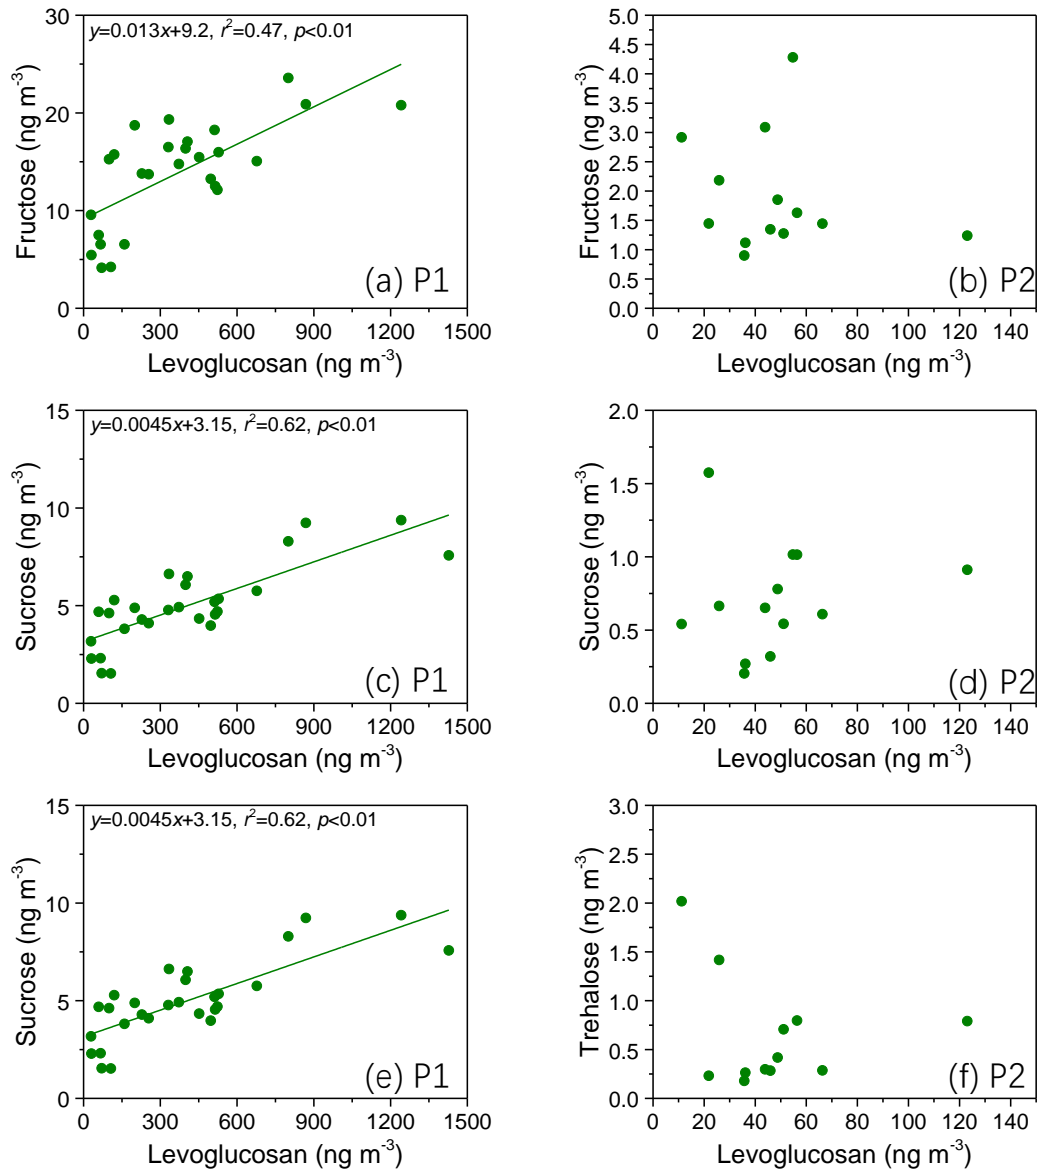

Figure S3 Relationships of fructose, sucrose, and trehalose with levoglucosan during P1 and P2.

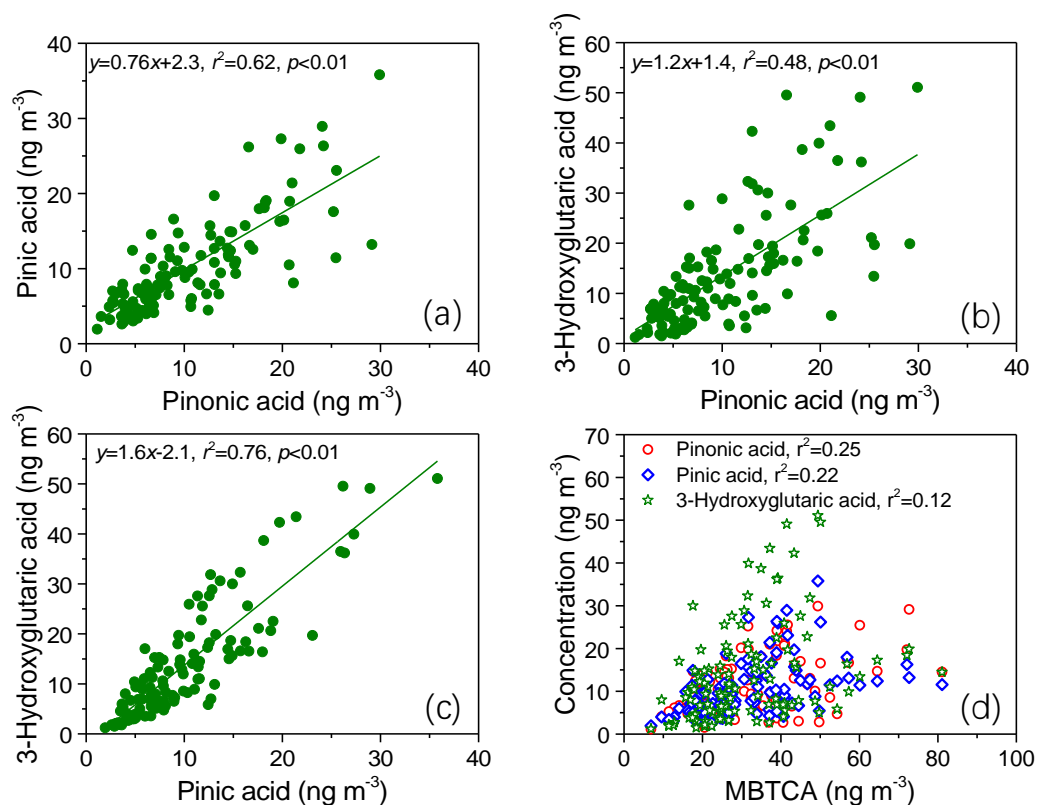

Figure S4 Relationships of the four  $\alpha$ -/ $\beta$ -pinene-derived products, i.e., pinonic acid, pinic acid, 3-hydroxyglutaric acid, and MBTCA, during the study period.

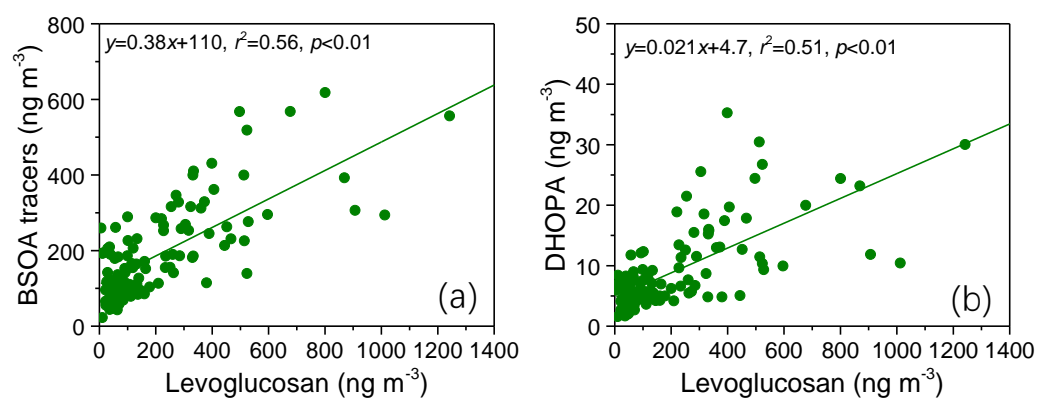

Figure S5 Relationships of the sum of BSOA tracers, and toluene-derived DHOPA with levoglucosan during the study period.
